# Supplementary material for: Ferric ion substitution renders cadmium metal–organic framework derivatives for modulated Li storage based on local oxidation active centers
Source: Royal Society of Chemistry journal article supplement (doi:10.1039/d2dt03392e), 2022-12-07
Supplement: d2dt03392e1.pdf [file d2dt03392e1.pdf]

## **Supporting Information**

### **Ferric ion substitution renders cadmium metal-organic framework derivatives for modulated Li storage based on local oxidation active center**

Wei Jiang<sup>a,d</sup>, Baihui Gao<sup>a</sup>, Guosong Yan<sup>a</sup>, Shichong Xu<sup>c</sup>, Xianyu Chu<sup>a</sup>, Guangbo Che<sup>a,e</sup>, Bo Liu<sup>a,\*</sup>, Ming Lu<sup>b,c,\*</sup>, Chunbo Liu<sup>a,d,\*</sup>

<sup>a</sup> *Key Laboratory of Preparation and Application of Environmental Friendly Materials (Jilin Normal University), Ministry of Education, Changchun 130103, PR China*

<sup>b</sup> *Shenyang National Laboratory for Materials Science, Institute of Metal Research, Chinese Academy of Sciences, Shenyang 110016, Liaoning, PR China*

<sup>c</sup> *Key Laboratory of Functional Materials Physics and Chemistry of the Ministry of Education, the Joint Laboratory of MXene Materials, Jilin Normal University, Changchun 130103, Jilin, PR China*

<sup>d</sup> *College of Engineering, Jilin Normal University, Siping, 136000, PR China*

<sup>e</sup> *College of Chemistry, Baicheng Normal University, Baicheng, 137000, P. R. China.*

**\*Corresponding authors.**

*E-mail addresses:*

luming@jlnu.edu.cn (M. Lu), liubo1999@jlnu.edu.cn (B. Liu), chunbolu@jlnu.edu.cn (C. Liu)

## 1. Figures and Tables

### 1.1. Crystal data

Crystal data was collected Bruker Smart Apex II CCD diffractometer with graphite-monochromatic MoK $\alpha$  radiation ( $\lambda = 0.71073 \text{ \AA}$ ) at room temperature. The structures were solved by direct methods of *SHELXS-2014* and refined on  $F^2$  by full-matrix least-squares using the *SHELXL-2014* within *WINGX*. All the calculations were performed under *WINGX* program. All non-hydrogen atoms were refined anisotropically, and the hydrogen atoms of organic ligands and water molecules were generated geometrically. The crystallographic data for **Cd-MOF** is listed in Table S1, selected bond lengths and bond angles are summarized in Table S2.

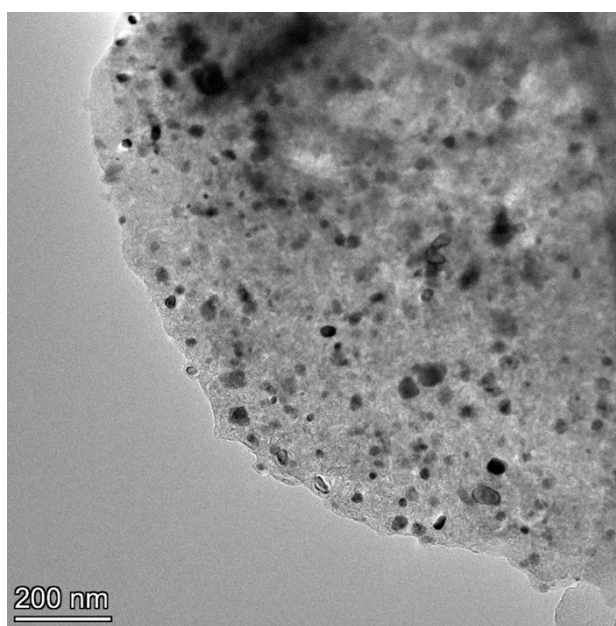

**Fig. S1.** TEM images of **Fe@Cd-MOFD**.

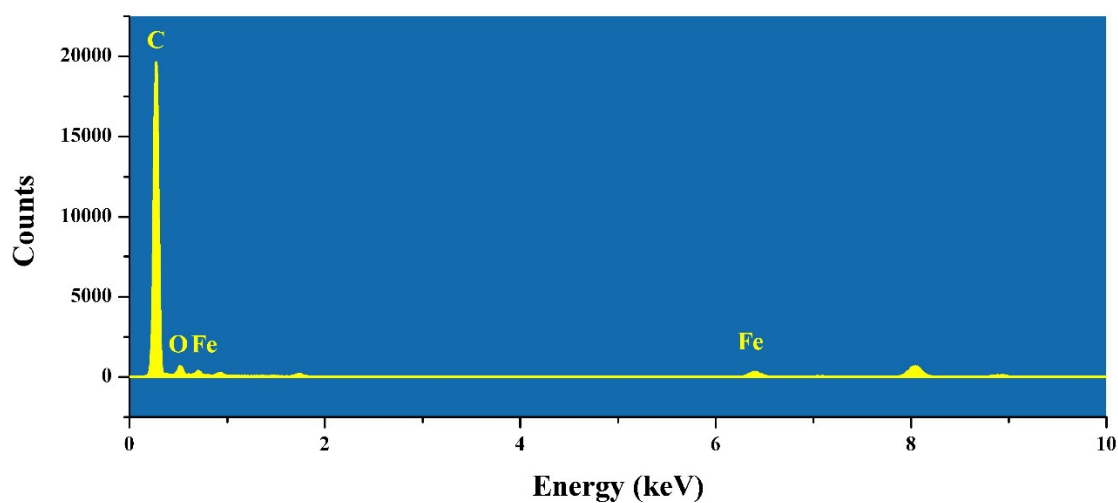

**Fig. S2.** EDX of **Fe@Cd-MOFD** obtained from TEM.

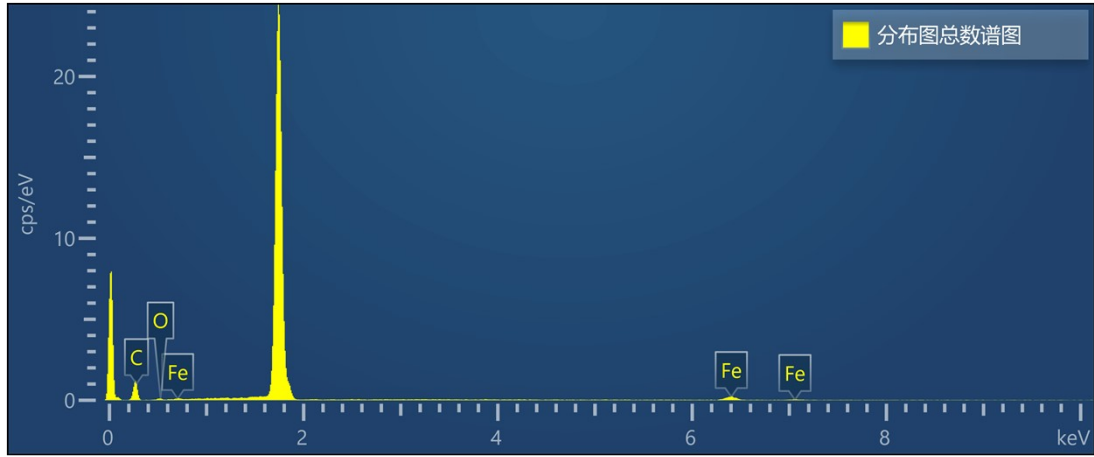

**Fig. S3.** EDX of Fe@Cd-MOFD obtained from SEM.

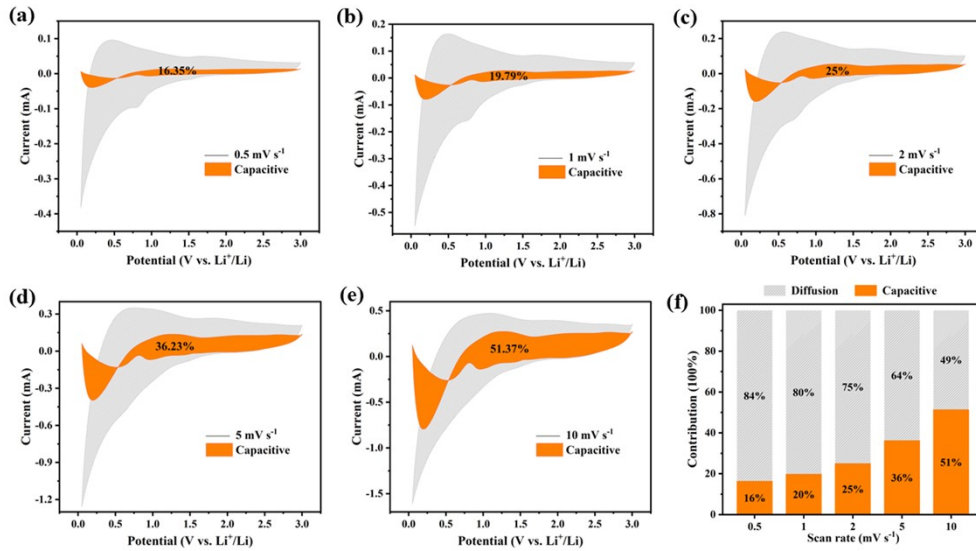

**Fig. S4** (a-e) Capacitive contribution of the Fe@Cd-MOFD from the scan rate of 0.5-10 mV s<sup>-1</sup>. (f) Contribution ratio of capacitive and diffusion at different scan rates.

To fully investigate the excellent performances of Fe@Cd-MOFD hollow nanostructures in LIBs, the reaction kinetics were analyzed by CV measurements at different scan rates from 0.5 to 10 mV s<sup>-1</sup> (Fig. S4). According to previous reports, there is a power law between measured current and scan rate.

$$i = k_1 v + k_2 v^{1/2} \quad (1)$$

Where  $k_1$  and  $k_2$  are the constants at a fixed potential,  $v$  is the scan rate. The determination of  $k_1$  and  $k_2$  allows calculating the proportion of capacitive contribution ( $k_1 v$ ) or diffused behavior ( $k_2 v^{1/2}$ ). Fig. S4 shows that the capacitive contribution

gradually increased from 16.35 to 51.37% with the scan rate increasing from 0.5-10 mV s<sup>-1</sup>.

**Table S1** Selected crystallographic data for **Cd-MOF**.

| Compound                                                        | <b>Cd-MOF</b>                                                    |
|-----------------------------------------------------------------|------------------------------------------------------------------|
| Formula                                                         | C <sub>47</sub> H <sub>52</sub> CdN <sub>3</sub> O <sub>16</sub> |
| <i>Mr</i>                                                       | 1027.34                                                          |
| Crystal system                                                  | Monoclinic                                                       |
| Space group                                                     | <i>P</i> 2 <sub>1</sub> /n                                       |
| <i>a</i> (Å)                                                    | 21.479(4)                                                        |
| <i>b</i> (Å)                                                    | 7.9353(16)                                                       |
| <i>c</i> (Å)                                                    | 32.660(6)                                                        |
| $\alpha$ (°)                                                    | 90                                                               |
| $\beta$ (°)                                                     | 105.015(4)                                                       |
| $\gamma$ (°)                                                    | 90                                                               |
| <i>V</i> (Å <sup>3</sup> )                                      | 5376.6(18)                                                       |
| <i>Z</i>                                                        | 4                                                                |
| <i>D</i> <sub>calc</sub> (g cm <sup>-3</sup> )                  | 1.215                                                            |
| <i>F</i> (000)                                                  | 1984                                                             |
| <i>R</i> <sub>int</sub>                                         | 0.0932                                                           |
| GOF on <i>F</i> <sup>2</sup>                                    | 1.012                                                            |
| <i>R</i> <sub>1</sub> <sup>a</sup> [ <i>I</i> > 2σ( <i>I</i> )] | 0.0907                                                           |
| <i>wR</i> <sub>2</sub> <sup>b</sup> (all data)                  | 0.3211                                                           |
| CCDC                                                            | 2151098                                                          |

$$^a R_1 = \Sigma ||F_o| - |F_c|| / \Sigma |F_o|. \quad ^b wR_2 = \{ \Sigma [w(F_o^2 - F_c^2)^2] / \Sigma w(F_o^2)^2 \}^{1/2}.$$

**Table S2** Selected bond distances (Å) and angles (°) for **Cd-MOF**.

| Bond       | Distance   | Bond       | Distance   |
|------------|------------|------------|------------|
| Cd(1)-O(1) | 2.3663(39) | Cd(1)-O(7) | 2.2692(37) |
| Cd(1)-O(2) | 2.4955(37) | Cd(1)-O(8) | 2.5051(41) |

| Cd(1)-O(3)                                                                                                                                         | 2.2521(55) | Cd(1)-O(13)                                  | 2.3045(40) |
|----------------------------------------------------------------------------------------------------------------------------------------------------|------------|----------------------------------------------|------------|
| Cd(1)-O(4)                                                                                                                                         | 2.4991(24) |                                              |            |
| Angle                                                                                                                                              | (°)        | Angle                                        | (°)        |
| O(3) <sup>#1</sup> -Cd(1)-O(7) <sup>#2</sup>                                                                                                       | 136.0(3)   | O(3) <sup>#1</sup> -Cd(1)-O(7) <sup>#2</sup> | 136.0(3)   |
| O(3) <sup>#1</sup> -Cd(1)-O(13)                                                                                                                    | 109.4(3)   | O(3) <sup>#1</sup> -Cd(1)-O(13)              | 109.4(3)   |
| O(7) <sup>#2</sup> -Cd(1)-O(13)                                                                                                                    | 87.5(3)    | O(7) <sup>#2</sup> -Cd(1)-O(13)              | 87.5(3)    |
| O(3) <sup>#1</sup> -Cd(1)-O(1)                                                                                                                     | 133.4(3)   | O(3) <sup>#1</sup> -Cd(1)-O(1)               | 133.4(3)   |
| O(7) <sup>#2</sup> -Cd(1)-O(1)                                                                                                                     | 87.8(3)    | O(7) <sup>#2</sup> -Cd(1)-O(1)               | 87.8(3)    |
| O(13)-Cd(1)-O(1)                                                                                                                                   | 82.5(3)    | O(13)-Cd(1)-O(1)                             | 82.5(3)    |
| O(3) <sup>#1</sup> -Cd(1)-O(2)                                                                                                                     | 83.7(3)    | O(3) <sup>#1</sup> -Cd(1)-O(2)               | 83.7(3)    |
| O(7) <sup>#2</sup> -Cd(1)-O(2)                                                                                                                     | 123.5(3)   | O(7) <sup>#2</sup> -Cd(1)-O(2)               | 123.5(3)   |
| O(13)-Cd(1)-O(2)                                                                                                                                   | 119.8(3)   | O(13)-Cd(1)-O(2)                             | 119.8(3)   |
| O(1)-Cd(1)-O(2)                                                                                                                                    | 53.2(2)    | O(1)-Cd(1)-O(2)                              | 53.2(2)    |
| O(3) <sup>#1</sup> -Cd(1)-O(8) <sup>#2</sup>                                                                                                       | 101.7(3)   | O(3) <sup>#1</sup> -Cd(1)-O(8) <sup>#2</sup> | 101.7(3)   |
| Symmetry transformations used to generate equivalent atoms: <sup>#1</sup> -x+1, -y-1, -z <sup>#2</sup> -x+1/2, y-1/2, -z+1/2 CCDC number : 2151098 |            |                                              |            |

**Table S3** The EDS data of **Fe@Cd-MOFD**.

|    | wt%   | at%   |
|----|-------|-------|
| C  | 70.39 | 85.72 |
| O  | 10.01 | 9.15  |
| Fe | 19.60 | 5.13  |
